# Supplementary material for: Properties of Carbon Fibers as Supercapacitor Electrodes via Electrospinning Using a Blending Solution of Polyacrylonitrile and Bisphenol A
Source: MDPI journal article supplement (doi:10.3390/en17071732), 2024-04-04
Supplement: s1 [file s1]

## Supplementary Materials

### **Properties of Carbon Fibers as Supercapacitor Electrodes via Electrospinning Using a Blending Solution of Polyacrylonitrile and Bisphenol A**

*Ji-Woo Park, Young-Wan Ju\**

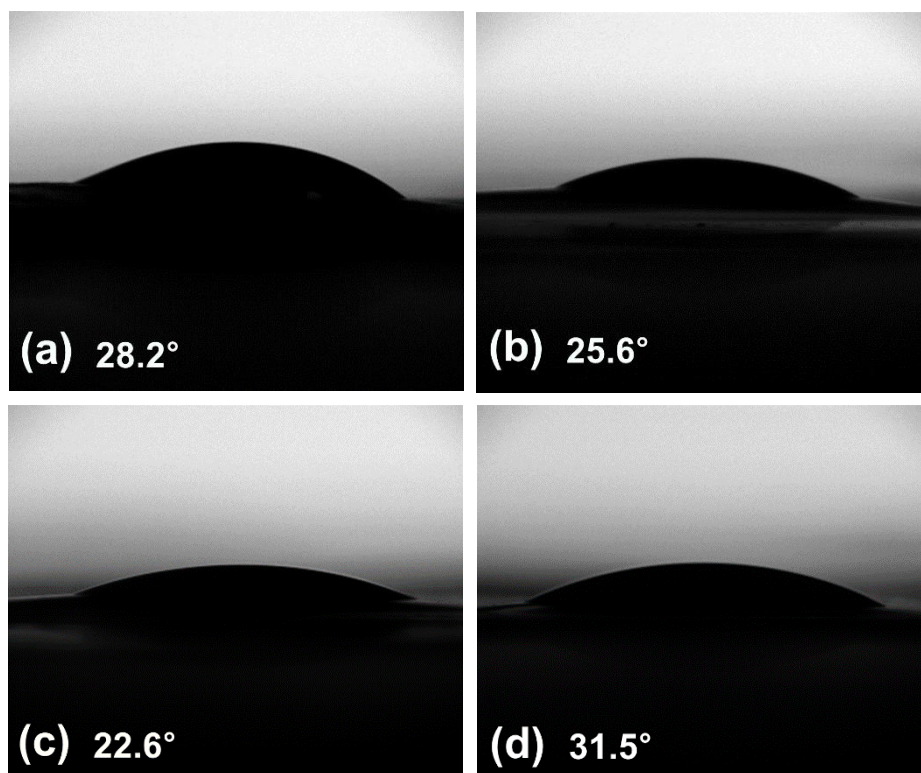

**Figure S1.** Contact angle images of samples (a) BPA0, (b) BPA1, (c) BPA3, and (d) BPA5.
